# Supplementary material
Source: HighWire-hosted journal article supplement (https://www.rcpjournals.org/highwire/filestream/12768/field_highwire_adjunct_files/3/S12._Effect_of_blood_inflammatory_and_immune_biomarkers_during_acute_admission_on_post-COVID_symptom_burden_in_patients_following_admission.pdf)
Supplement: S12._Effect_of_blood_inflammatory_and_immune_biomarkers_during_acute_admission_on_post-COVID_symptom_burden_in_patients_following_admission.pdf [file S12._Effect_of_blood_inflammatory_and_immune_biomarkers_during_acute_admission_on_post-COVID_symptom_burden_in_patients_following_admission.pdf]

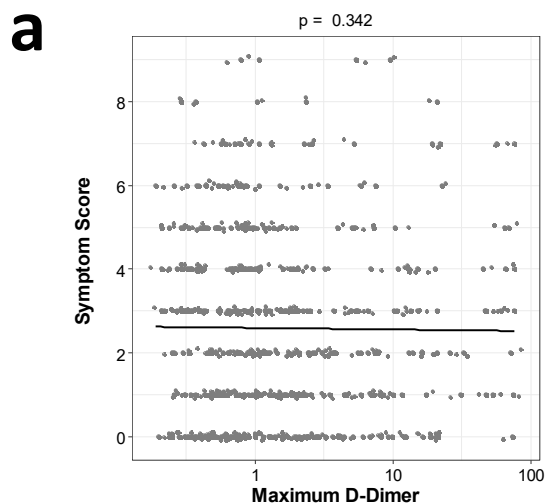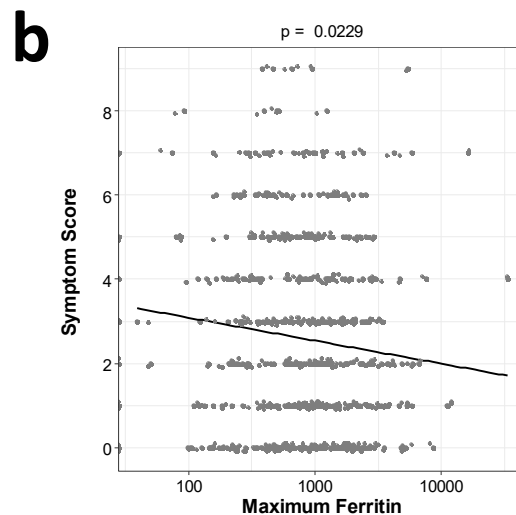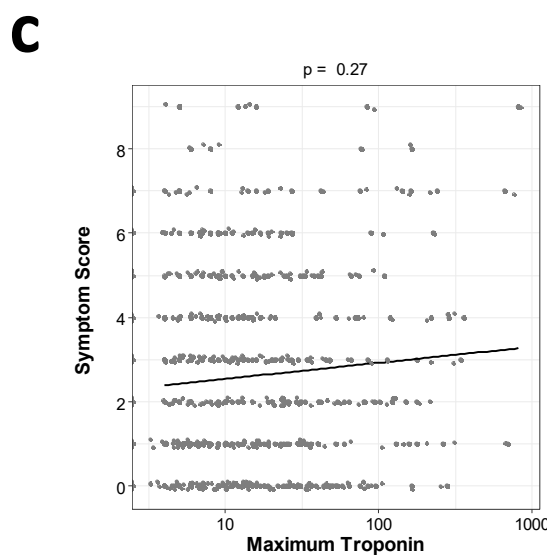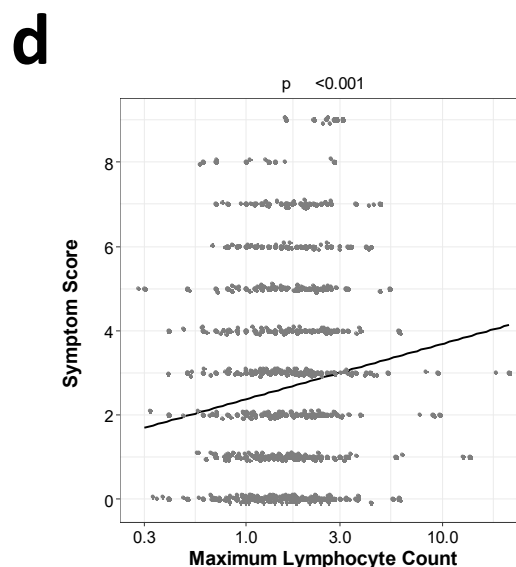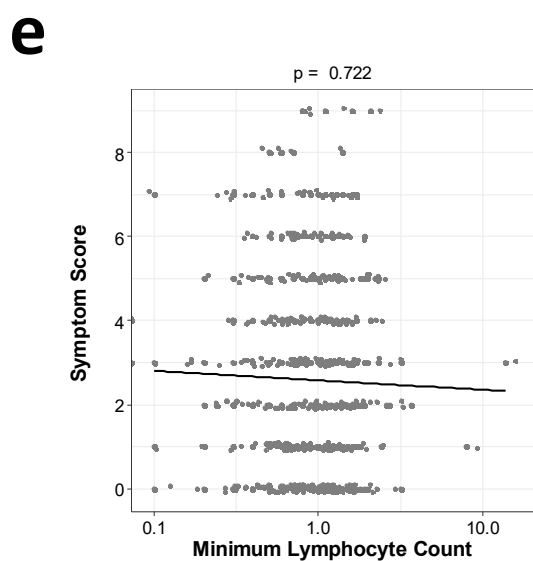

## S12. Effect of blood inflammatory and immune biomarkers during acute admission on post-COVID symptom burden in patients following admission for COVID pneumonia.

Plots of Symptom Score against (a) maximum D-Dimer, (b) maximum Ferritin, (c) maximum Troponin, (d) maximum Lymphocyte count and (e) minimum Lymphocyte count during admission. P values for Spearman's Rank Correlation Coefficients.
